# Supplementary material
Source: Springer Nature journal article supplement (https://www.springermedizin.de/resource/supplementary/12913_2012_2561_MOESM3_ESM.pdf/9530866)
Supplement: MOESM3 [file 9530866]

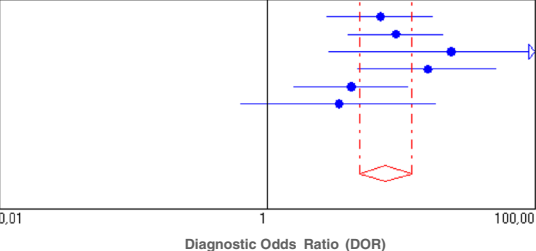

### Diagnostic Odds Ratio (95%CI)

|                             |                       |
|-----------------------------|-----------------------|
| TNH-STRATIFY Barker 11      | 6.95 (2.79 – 17.30)   |
| STRATIFY>=1 Milisen 07 med  | 9.08 (4.02 – 20.52)   |
| STRATIFY>=1 Milisen 07 surg | 23.50 (2.87 – 192.13) |
| MODIF-STRATIFY Papaioa 04   | 15.66 (4.73 – 51.80)  |
| STRATIFY>=2 Vassallo 05     | 4.23 (1.59 – 11.25)   |
| STRATIFY>=2 Walsh 10        | 3.41 (0.64 – 18.29)   |

Random Effects Model

Global DOR= 7.64 (4.86 to 12.01)

Cochran-Q= 5.10; df= 5 (p=0.4035)

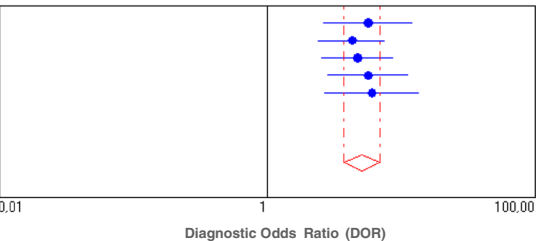

### Diagnostic Odds Ratio (95%CI)

|                    |                     |
|--------------------|---------------------|
| MFS>=51 Chapman 11 | 5.67 (2.65 – 12.15) |
| MFS>=51 Kim KS 11  | 4.29 (2.41 – 7.64)  |
| MFS>=50 Kim KS 11  | 4.71 (2.54 – 8.72)  |
| MFS>=55 Schw 06    | 5.68 (2.84 – 11.36) |
| MFS>=55 Schw 07    | 6.04 (2.67 – 13.64) |

Random Effects Model

Global DOR= 5.07 (3.75 to 6.86)

Cochran-Q= 0.74; df= 4 (p= 0.9465)

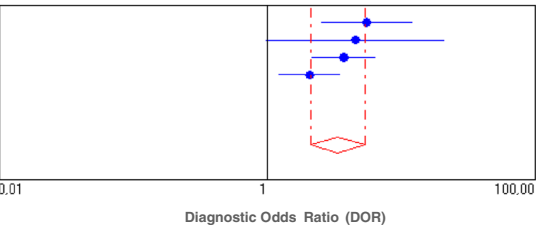

### Diagnostic Odds Ratio (95%CI)

|                    |                     |
|--------------------|---------------------|
| HFRM II Chapman 11 | 5.52 (2.52 – 12.09) |
| HFRM II Ivzik 11   | 4.53 (0.98 – 20.89) |
| HFRM II Kim EAN 07 | 3.72 (2.14 – 6.48)  |
| HFRM II Lovallo 10 | 2.07 (1.22 – 3.49)  |

Random Effects Model

Global DOR= 3.36 (2.11 to 5.36)

Cochran-Q= 5.04; df= 3 (p=0.1692)
